# Supplementary material
Source: publisher figshare collection journal article supplement (https://tandf.figshare.com/ndownloader/files/13475057)
Supplement: Supplementary file 1 [file 13475057]

Dear Editor,

We would like to thank the three anonymous reviewers for their insightful comments and suggestions on the paper, as these comments led us to improve our work.

| **Reviewer 1: Comments to the Author** |  |
| --- | --- |
| The paper has improved and some significant work has been developed The main issue remains: which is how we can develop destinations | We thank you for your assistance in enabling us improve our work. |
| **Reviewer 2: Comments to the Author** |  |
| It is still not convincing that interviews from 18 people are sufficient for the development of the Inclusive Tourism Stakeholder Framework. It would be best if the authors explaining the framework based on existing literature with the support of the exploratory study. | We appreciate your valuable and insightful comments that led us to vastly improve the methodology, findings, discussions and conclusions sections of the paper. |
| **Reviewer 3: Comments to the Author** |  |
| This is a much improved paper. | We thank you for your assistance in enabling us improve our work. |
